# Supplementary material for: Exosomal miRNA Biomarker Panel for Pancreatic Ductal Adenocarcinoma Detection in Patient Plasma: A Pilot Study
Source: MDPI journal article supplement (doi:10.3390/ijms24065081), 2023-03-07
Supplement: s1 [file s1]

**Supplementary Figure S1.** KEGG pathways and Gene ontology analysis of differentially expressed plasma exosome miRNAs. Heatmaps show the top most statistically significant KEGG pathways (A) and Gene Ontology terms (B) associated with the four miRs (miR-425-5p, miR-425-3p, and miR-339-3p, miR-93-5p).
