# Supplementary figures and images for: Exosomal miRNA Biomarker Panel for Pancreatic Ductal Adenocarcinoma Detection in Patient Plasma: A Pilot Study
Source: MDPI journal article supplement (doi:10.3390/ijms24065081), 2023-03-07

A

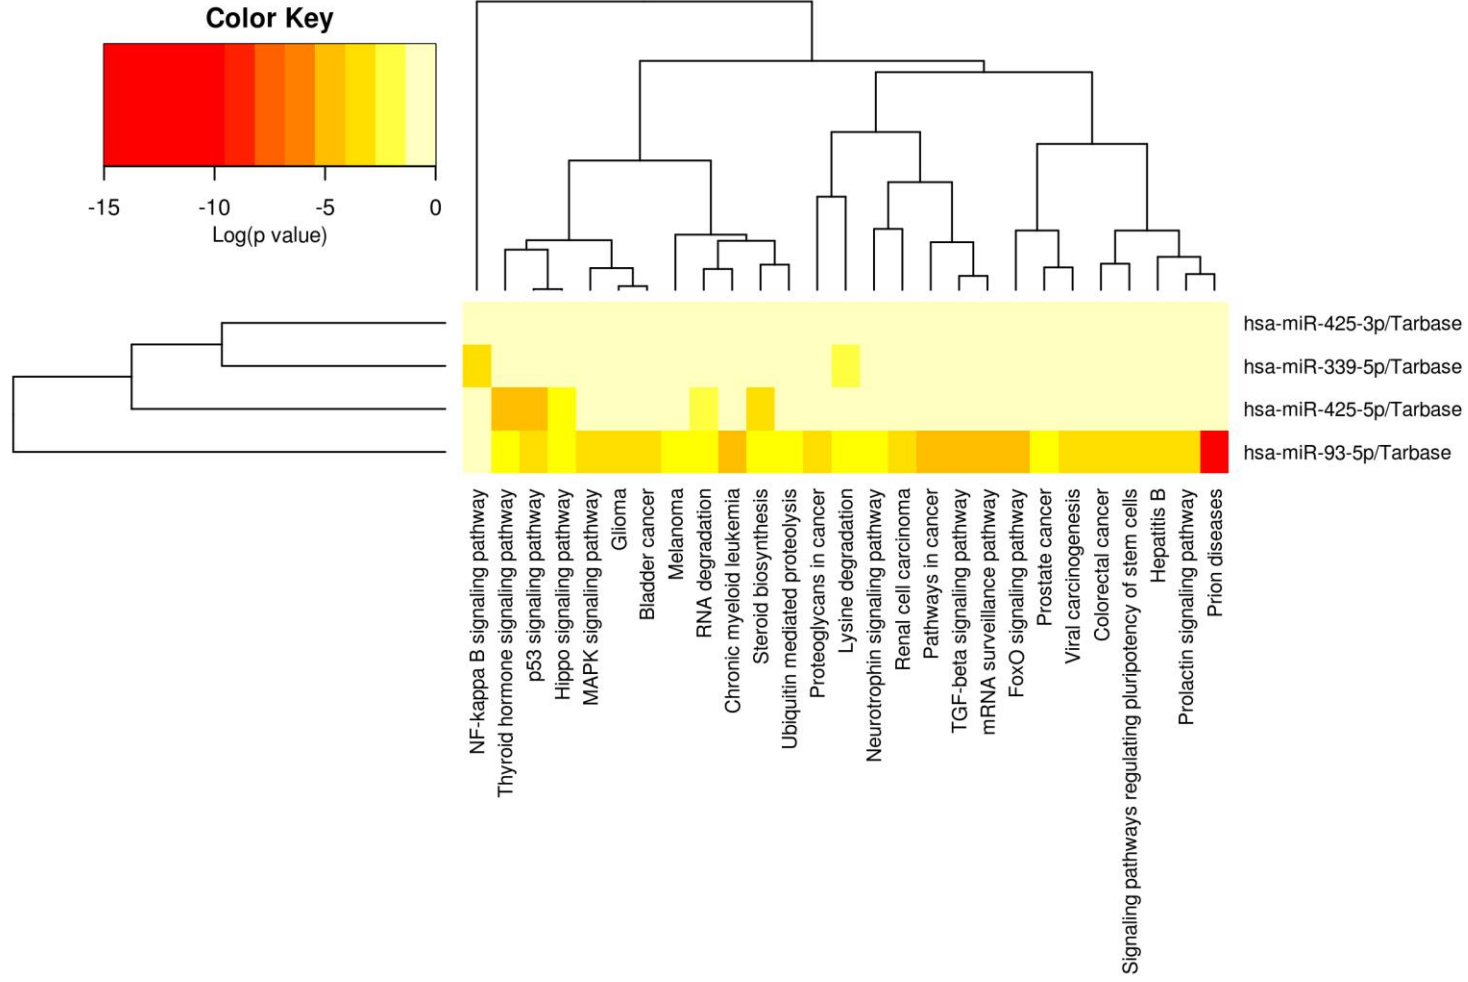

B

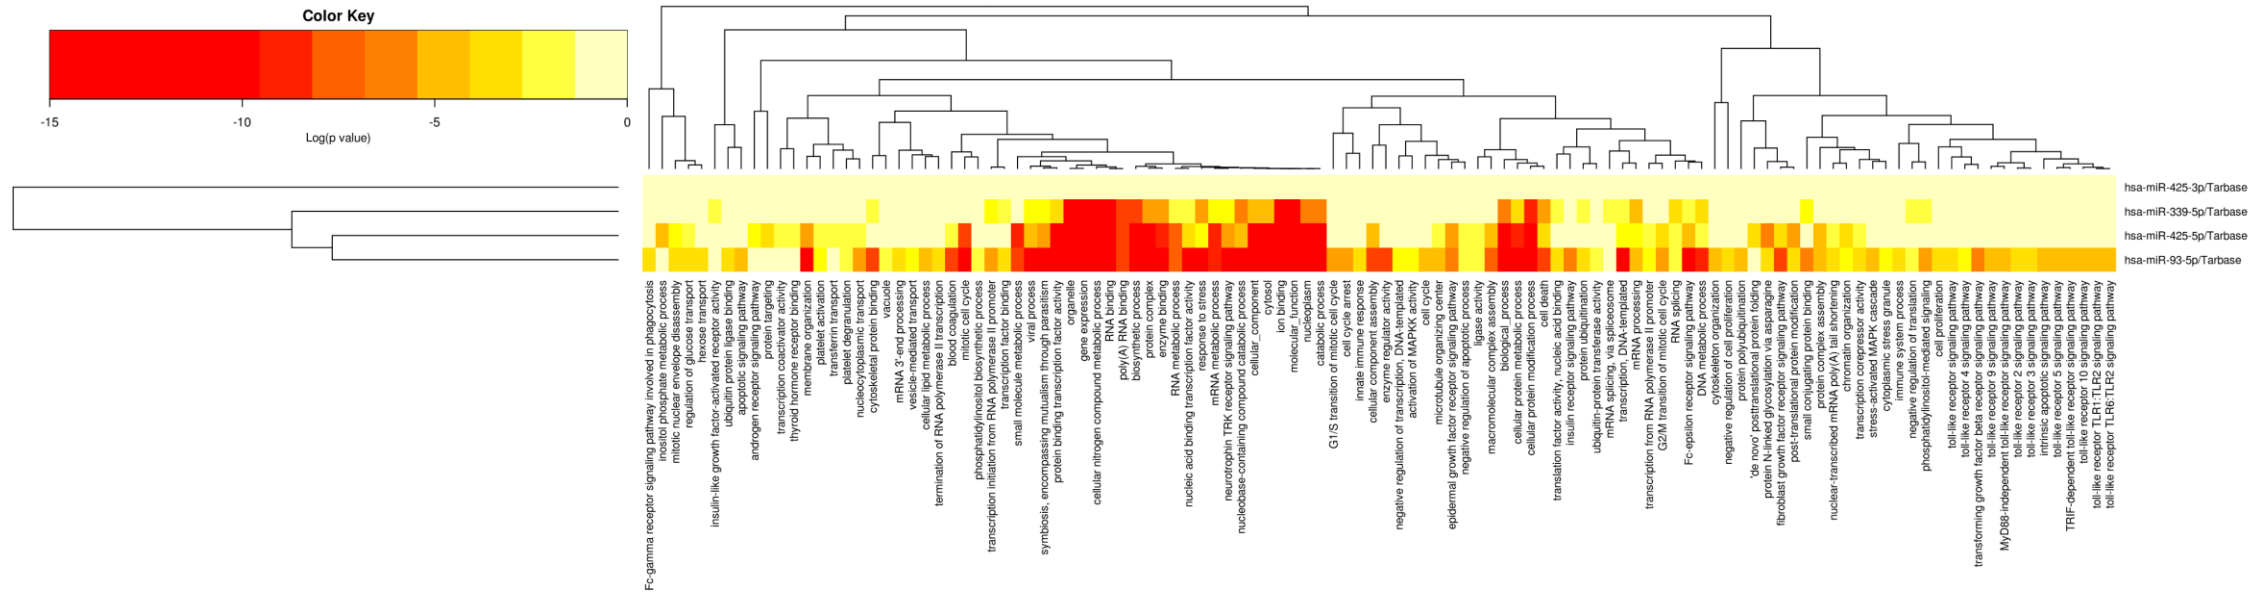

Supplement: s1 [file s1]
